# Supplementary material for: Acidosis induces reprogramming of cellular metabolism to mitigate oxidative stress
Source: PubMed Central journal article supplement (PMC4178214; doi:10.1186/2049-3002-1-23), 2013-12-23
Supplement: 2049-3002-1-23-S7.pdf [file 2049-3002-1-23-S7.pdf]

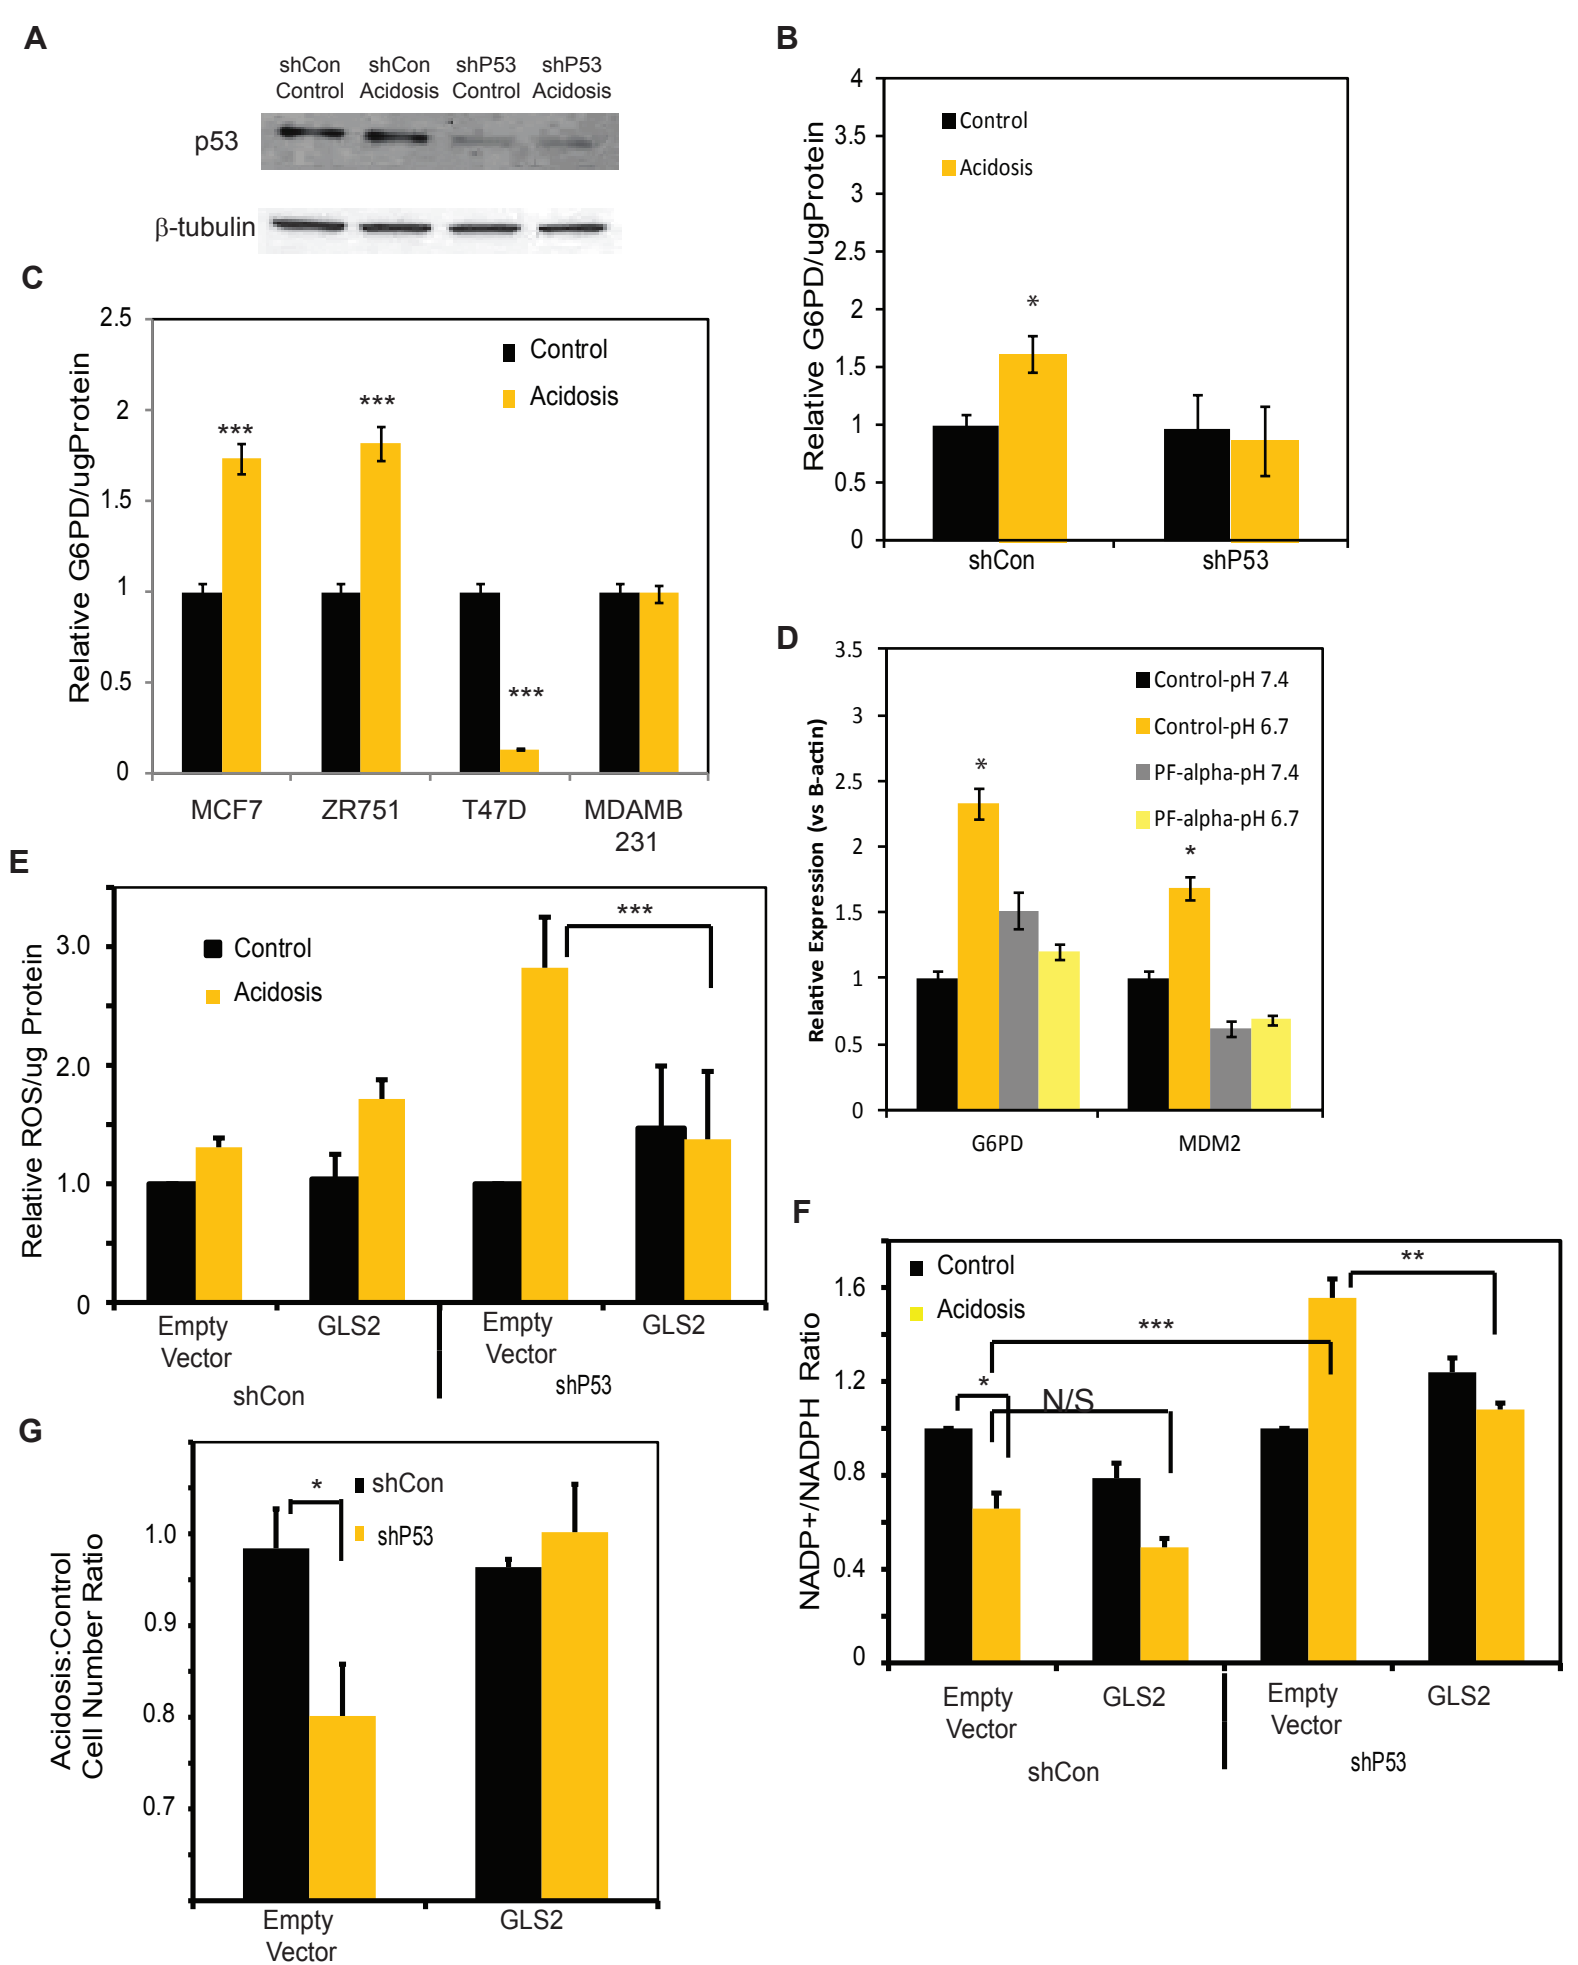

Figure S6
